# Supplementary material for: CRISPR/nCas9-Based Genome Editing on GM2 Gangliosidoses Fibroblasts via Non-Viral Vectors
Source: MDPI journal article supplement (doi:10.3390/ijms231810672), 2022-09-14
Supplement: s1 [file s1]

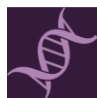

*Supplementary information*

# CRISPR/nCas9-Based Genome Editing on GM2 Gangliosidoses Fibroblasts via Non-Viral Vectors

Andrés Felipe Leal <sup>1</sup>, Javier Cifuentes <sup>2</sup>, Valentina Quezada <sup>2</sup>, Eliana Benincore-Flórez <sup>1</sup>, Juan Carlos Cruz <sup>2</sup>, Luis Humberto Reyes <sup>3</sup>, Angela Johana Espejo-Mojica <sup>1</sup>, Carlos Javier Alméciga-Díaz <sup>1,\*</sup>

<sup>1</sup> Institute for the Study of Inborn Errors of Metabolism, Faculty of Science, Pontificia Universidad Javeriana, Bogotá 110231, Colombia

<sup>2</sup> Department of Biomedical Engineering, Universidad de los Andes, Bogotá 111711, Colombia

<sup>3</sup> Grupo de Diseño de Productos y Procesos (GDPP), Department of Chemical and Food Engineering, Universidad de los Andes, Bogotá 111711, Colombia

\* Correspondence: [cjalmeciga@javeriana.edu.co](mailto:cjalmeciga@javeriana.edu.co); Tel./Fax: +57-1-3208320 (ext. 4140/4099)

## Content

|                                                                        |   |
|------------------------------------------------------------------------|---|
| <b>Supplementary Table S1.</b> List of primers used in this study..... | 3 |
| <b>Supplementary Figure S1.</b> MTT and LDH assays.....                | 4 |
| <b>Supplementary Figure S2.</b> Nitric oxide determination.....        | 5 |
| <b>Supplementary Reference</b> .....                                   | 6 |

**Supplementary Table S1.** List of primers used in this study. The sequences for MfeI and MluI enzymes are highlighted in yellow and green, respectively. \*Sequences correspond to Leal & Alméciga, 2022 [1].

| Purpose                   | Target    | Forward (5' to 3')           | Reverse (5' to 3')                         |
|---------------------------|-----------|------------------------------|--------------------------------------------|
| HEXA ORF<br>amplification | HEXA      | CGATCAATTGATGGCAAGCTCCAGGCTT | ATCGACGCGTGGTCTGTTCAAACCTCTG               |
| HEXB ORF<br>amplification | HEXB      | CGATCAATTGATGGAGCTGTGCGGGCTG | ATCGACGCGTCATGTTCTCATGGTTACAA-<br>TATCCAGC |
| *Homologous               | AAVS1-Out | TTCGATTGGAGTCGCTTTAACTG      | -                                          |
| recombination assay       | CMV       | -                            | AGCTCTGCTTATATAGACCTCC                     |

**Supplementary Figure S1.** MTT and LDH assays. The figure shows the % of cell viability of GM2 fibroblasts after their interaction with 25 µg/mL/0.05 mg/mL MNPs@Ag-pD/BUF-II:liposome for 48 hours. \*\*  $p \leq 0.01$ .

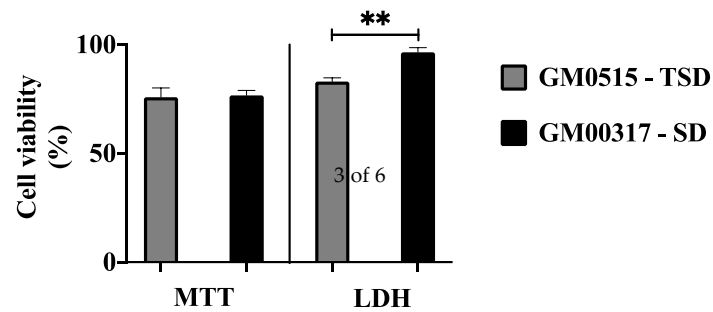

**Supplementary Figure S2.** Nitric oxide determination. The figure shows the effect of the long-term CRISPR/nCas9-based genome edition on GM2 fibroblasts. Positive control corresponds to the incubation of fibroblasts with 1 $\mu$ M lipopolysaccharide Escherichia coli O111:B4.

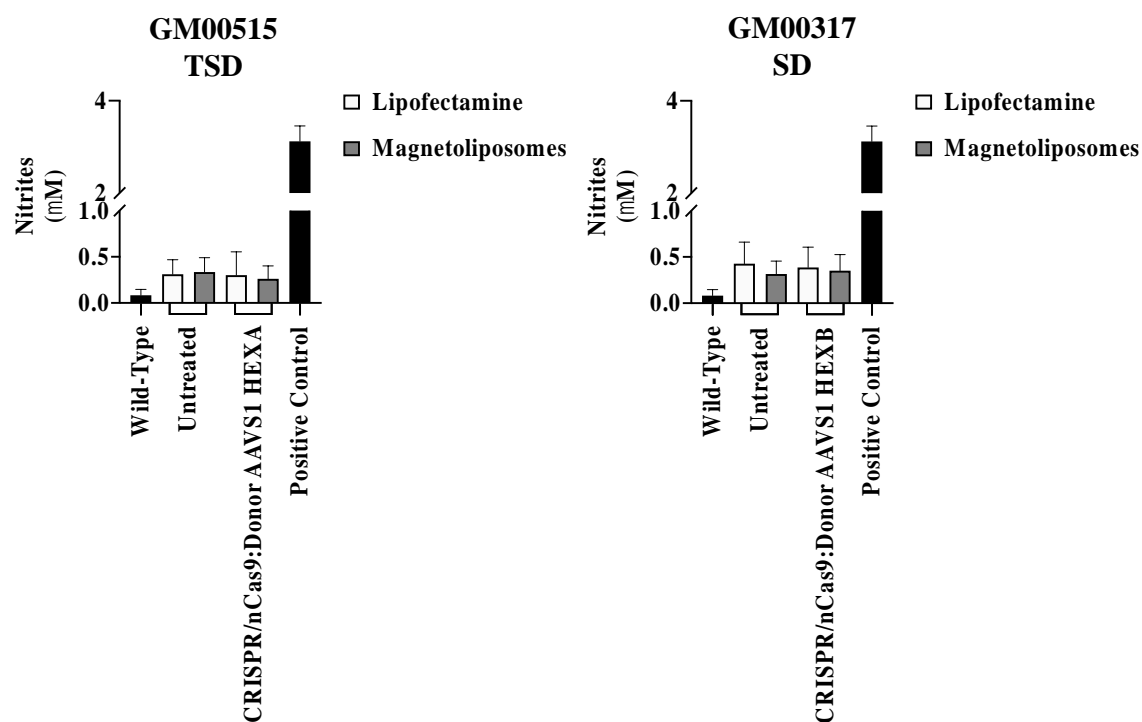

---

### Supplementary Reference

1. Leal, A.F. and C.J. Alméciga-Díaz, *Efficient CRISPR/Cas9 nickase-mediated genome editing in an in vitro model of mucopolysaccharidosis IVA*. Gene Ther, 2022.
